## Review Article

# Carbohydrate esterases involved in deacetylation of food components by the human gut microbiota

 Sabina Leanti La Rosa,  Lars J. Lindstad and  Bjørge Westereng

Faculty of Chemistry, Biotechnology and Food Science, Norwegian University of Life Sciences, 1433, Aas, Norway

**Correspondence:** Bjørge Westereng (bjorge.westereng@nmbu.no)

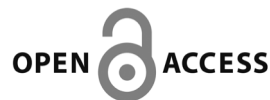

Non-carbohydrate modifications such as acetylations are widespread in food stuffs as well as they play important roles in diverse biological processes. These modifications meet the gut environment and are removed from their carbohydrate substrates by the resident microbiota. Among the most abundant modifications are *O*-acetylations, contributing to polysaccharides physico-chemical properties such as viscosity and gelling ability, as well as reducing accessibility for glycosyl hydrolases, and thus hindering polysaccharide degradation. Of particular note, *O*-acetylations increase the overall complexity of a polymer, thus requiring a more advanced degrading machinery for microbes to utilize it. This minireview describes acetylerases from the gut microbiota that deacetylate various food polysaccharides, either as natural components of food, ingredients, stabilizers of microbial origin, or as part of microbes for food and beverage preparations. These enzymes include members belonging to at least 8 families in the CAZy database, as well as a large number of biochemically characterized esterases that have not been classified yet. Despite different structural folds, most of these acetylerases have a common acid–base mechanism and belong to the SGNH hydrolase superfamily. We highlight examples of acetylerases that are highly specific to one substrate and to the position of the acetyl group on the glycosyl residue of the carbohydrate, while other members that have more broad substrate specificity. Current research aimed at unveiling the functions and regioselectivity of acetylerases will help providing fundamental mechanistic understanding on how dietary components are utilized in the human gut and will aid developing applications of these enzymes to manufacture novel industrial products.

## Introduction

Resident bacterial communities (collectively known as the gut microbiota) inhabiting the distal gastrointestinal tract of humans are responsible for the degradation of undigested food components, such as carbohydrates, which cannot be directly processed by their host [1]. In return, the host receives a wide range of microbial metabolites, including short-chain fatty acids (SCFAs) that contribute to up to 10% of the bodily energy budget and exert a range of health-promoting functions [2]. The most abundant SCFAs are acetate, propionate, and butyrate. These three metabolites represent 90–95% of the SCFAs present in the colon. Other fermentation products such as lactate, succinate and 1,2-propanediol are also generated, but do not accumulate in high concentrations, as they act as substrates for metabolism by other bacteria [1]. The dominating phyla in the gut microbiota of humans are Bacteroidetes and Firmicutes; their composition and abundance vary extensively between individuals and geographically as an effect of variations of diet, lifestyle, and health status [3,4].

To facilitate metabolism of dietary polysaccharides, the genomes of gut bacteria often contain an arsenal of many dozens or hundreds of individual carbohydrate-active enzymes (CAZymes), frequently co-regulated and co-localized in gene clusters known as polysaccharide utilization loci (PULs) [5].

Received: 09 December 2022  
Revised: 20 February 2023  
Accepted: 21 February 2023

Version of Record published:  
18 April 2023

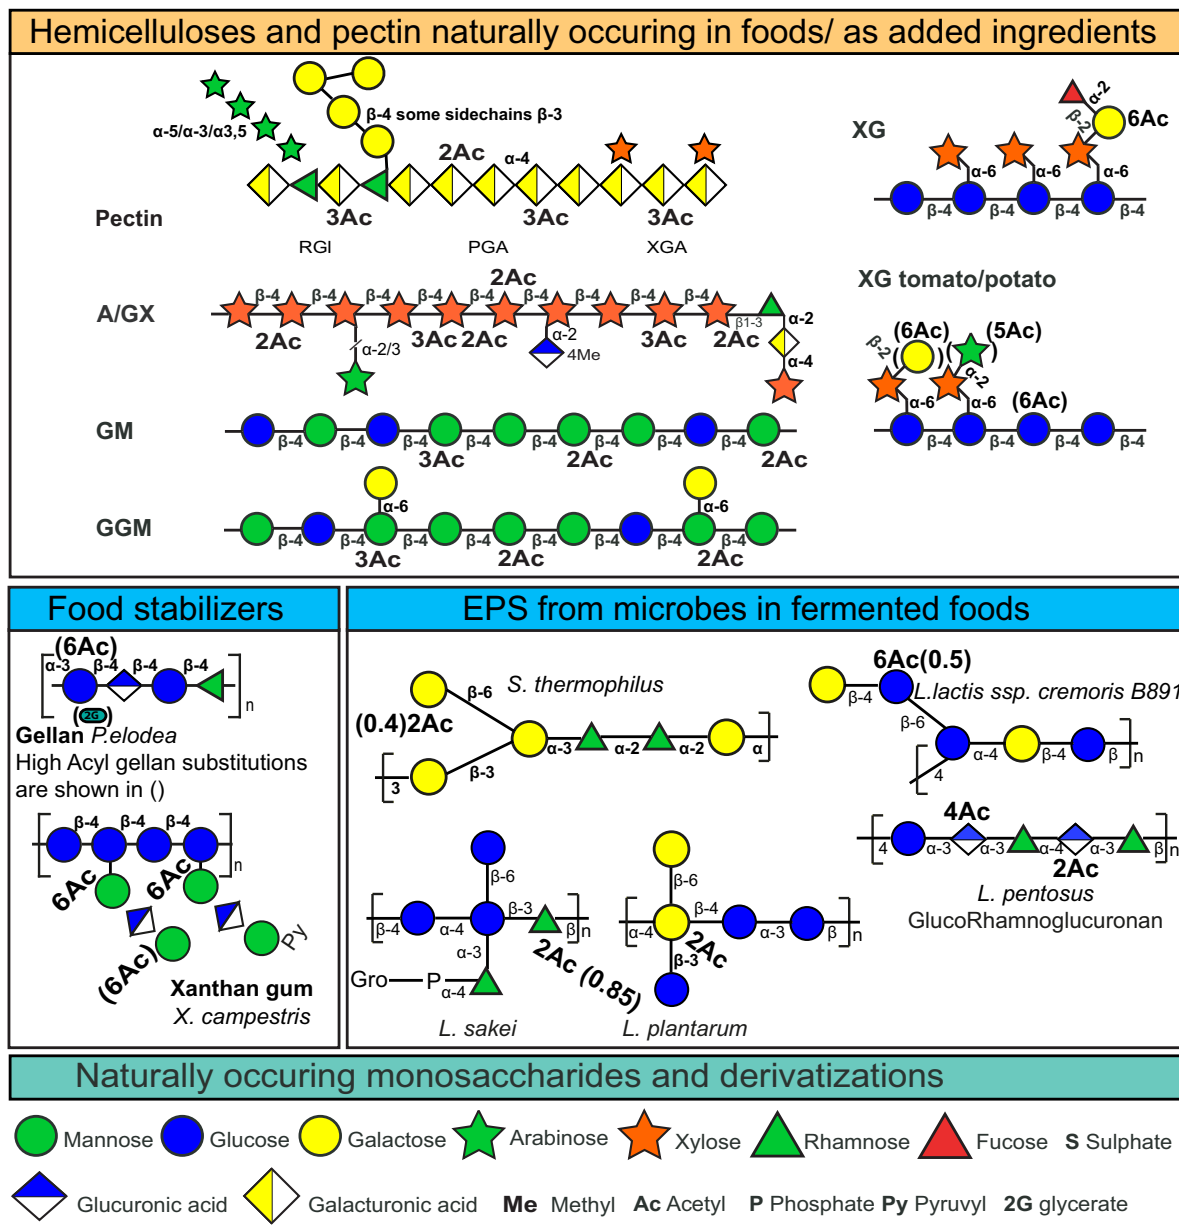

**Figure 1. Examples of polysaccharides, found in foods, that contain different extents of acetylations.** XG, xyloglucan; A/GX, arabino/glucuronoxylan; GM, glucomannan; GGM, galactoglucomannan; Gro, glycerol (in *L. sakei* 0-1's EPS structure). Structures with parenthesis represent variants of the polysaccharide in question, brackets with numbers indicate the degree of acetylation (number of acetylations per monosaccharide annotated). Symbols are drawn according to [12,13].

CAZymes are classified based into families in the CAZy database ([6,7]). The members of a family share the same fold, the same catalytic apparatus and mechanism. PUL-encoded systems from gut Bacteroidetes and Firmicutes have been shown to target a wide range of complex carbohydrates, including common terrestrial and marine plants, microbial exopolysaccharides and host glycans [3].

The non-cellulosic plant cell wall polysaccharides such as hemicellulose and pectin are differentially esterified by *O*-acetyl groups (Figure 1) as a form of defense against hydrolytic enzymes secreted by different fungi and bacterial pathogens. Furthermore, *O*-acetyl groups exist in a large number of food commodities (some examples are sketched in Figure 1). These ornamentations can be present on a wide range of structural motifs including glucose, xylose, galacturonic acid, mannose, rhamnose, as substituents in different positions of the monosaccharides. Specifically, these

modifications are naturally existing in common foods as pectin (including homogalacturonan, xylogalacturonan, rhamnogalacturonan I, and rhamnogalacturonan II [8]), xyloglucan [9,10], glucuronoxylan, glucuronoarabinoxylan, glucomannans, and galactoglucomannans. Furthermore, *O*-acetyl groups are present as structural components of bacterial exopolysaccharides that are widely used as food stabilizers (e.g. gellan and xanthan gum). In addition, there are *O*-acetylation on exopolysaccharides produced by bacteria directly used for food and beverage production [11], which in many cases play a crucial role for the texture and sensoric palatability of foodstuffs as in, e.g., yoghurt, kefir, and various cheeses. In nature, cleavage of the ester bonds between carbohydrate residues and acetyl groups is catalyzed primarily by microbial carbohydrate esterases (CEs) that are classified into 20 families according to the CAZy database (Table 1, <http://www.cazy.org/Carbohydrate-Esterases.html>, as per February 2023).

In this review, we focus on carbohydrate esterases found in the human gut microbiota and describe recent studies that have led to the discovery of new specialized esterase activities from gut bacteria. This knowledge is essential to fully understand the important role of CEs in degradation of both plant polysaccharides and bacterial exopolysaccharides, as the removal of acetylations present on these polysaccharides modifies their physicochemical properties and allows the process of hydrolysis through glycoside hydrolases, and also provides fundamental insight into human digestion.

## The SGNH fold

Most of the known *O*-acetyl esterases are found among members of the SGNH hydrolase superfamily. This superfamily comprises a variety of carbohydrate-modifying enzymes, including but not limited to the carbohydrate esterase families 2, 3, 6, 12, 17, and 20 [14,15]. Several excellent reviews have recently described the current knowledge for these proteins [14,16]. In short, SGNH hydrolases share a conserved catalytic fold and mechanism. The SGNH domain contains five blocks of the highly conserved catalytic Ser, Gly, Asn, and His in blocks I, II, III, and V, respectively, while block IV does not have a catalytic residue but is structurally important for the overall fold. The mechanism for removal of acetyl sidechains involves the nucleophilic attack of the carbonyl carbon on the ester substrate by the nucleophilic Ser residue. The resulting tetrahedral oxyanion intermediate is stabilized by a positively charged pocket, known as the oxyanion hole, which is formed by the backbone amides of the Block I Ser and Block II Gly residues, and the sidechain amide of the Block III Asn residue. In the final step, a water molecule freely binds the covalent acetyl-enzyme intermediate and is deprotonated by the basic His, initiating a nucleophilic attack of the carbonyl carbon. Catalysis proceeds with the formation of an oxyanion intermediate, stabilized by hydrogen bonding in the oxyanion hole, that finally collapses to liberate the acetyl coproduct and the free enzyme [17].

## Deacetylation of pectin and xyloglucan

Pectins are common dietary fibers abundant in fruit and vegetables as well as being widely used as stabilizers and gelling agents [18]. Structurally, pectins consist of four major elements, all characterized by the presence of D-galacturonic acid (GalUA). They include homogalacturonan (HG), that is a linear polymer of 1,4-linked  $\alpha$ -D-GalUA residues that can be acetylated and esterified with methanol [19]; xylogalacturonan [20]; type I rhamnogalacturonan (RGI), composed of repeating disaccharide units of  $\beta$ -D-GalUA-(1,2)- $\alpha$ -L-Rha-1, to which different arabinan, galactan, and arabinogalactan side chains are attached [21,22] to the L-rhamnose residues; and rhamnogalacturonan II (RGII) that has a backbone of HG with complex sidechains of rare sugars attached to the GalUA residues (Figure 1). RGI and HG are arranged to form the backbone of pectins, with HG being the most abundant component (>65%) [19]. GalUA units of RG-I can be 2-*O* and/or 3-*O*-acetylated [23] which is an acetylation pattern similar to that found in homogalacturonan and xylogalacturonan [17].

Xyloglucan (XyG) is built of repeats of predominantly  $\beta$ -1,4-linked glucose tetramers (general structures are drawn in Figure 1), with various types of sidechain compositions (about 25 different types) [24]. Some parts of the xyloglucan are acetylated [25]. To date only three distinct XyG glycosyl units have been found to be acetylated [24]. *O*-Acetyl substituents are located at *O*-6 of the unbranched (internal)  $\beta$ -D-Glcp residue, *O*-6 of the terminal  $\beta$ -D-Galp residue, and/or at *O*-5 of the terminal  $\alpha$ -L-Arap residue [26] (Figure 1).

Although esterase activities on pectin and xyloglucan have been known for a long time [27], there are several recent discoveries of novel acetyl esterase activities which together take care of the large range of different acetylation in these complex polymers [28], a substrate complexity that is in line with the presence of a range of different acetyl esterases in the pectin and xyloglucan PULs of gut microbes.

The fact that both pectin and xyloglucan have acetylations in different structural elements (Figure 1) may explain why several esterase genes are involved in their deacetylation. CE6s and CE12s are the predominant esterases for pectin deacetylation. An example is shown in Figure 2D; despite this is an uncharacterized enzyme, it has a very

**Table 1 Carbohydrate esterase families and corresponding characterized enzyme activities**

| CE family | B | E | Known activities                                                        | EC number    | Catalytic residues | 3D structure                                                                                                                                                                                                                     |
|-----------|---|---|-------------------------------------------------------------------------|--------------|--------------------|----------------------------------------------------------------------------------------------------------------------------------------------------------------------------------------------------------------------------------|
| CE1       | ● | ● | Acetyl xylan esterase                                                   | EC 3.1.1.72  | SHD                | $\alpha/\beta$ hydrolase fold; central $\beta$ -sheet flanked by $\alpha$ -helices on both sides                                                                                                                                 |
|           |   |   | Cinnamoyl esterase                                                      | EC 3.1.1.-   |                    |                                                                                                                                                                                                                                  |
|           |   |   | Feruloyl esterase                                                       | EC 3.1.1.73  |                    |                                                                                                                                                                                                                                  |
|           |   |   | Carboxylesterase                                                        | EC 3.1.1.1   |                    |                                                                                                                                                                                                                                  |
|           |   |   | S-formylglutathione hydrolase                                           | EC 3.1.2.12  |                    |                                                                                                                                                                                                                                  |
|           |   |   | Diacylglycerol O-acyltransferase                                        | EC 2.3.1.20  |                    |                                                                                                                                                                                                                                  |
|           |   |   | Trehalose 6-O-mycosyltransferase                                        | EC 2.3.1.122 |                    |                                                                                                                                                                                                                                  |
| CE2       | ● | ● | Acetyl xylan esterase                                                   | EC 3.1.1.72  | SH                 | C-terminal SGNH domain with repeated $\alpha/\beta/\alpha$ motifs; N-terminal jellyroll domain with two $\beta$ -sheets in opposite orientation                                                                                  |
|           |   |   | Acetyl $\beta$ mannan esterase                                          | EC 3.1.1.6   |                    |                                                                                                                                                                                                                                  |
| CE3       | ● | ● | Acetyl xylan esterase                                                   | EC 3.1.1.72  | SHD                | Repeated $\alpha/\beta/\alpha$ motifs                                                                                                                                                                                            |
| CE4       | ● | ● | Acetyl xylan esterase                                                   | EC 3.1.1.72  | DHH                | Conserved catalytic core known as NodB domain; distorted ( $\alpha/\beta$ ) <sub>7</sub> barrel or ( $\alpha/\beta$ ) <sub>8</sub> barrel; dependency of metal ion (Co <sup>2+</sup> , Zn <sup>2+</sup> ) for enzymatic activity |
|           |   |   | Chitin deacetylase                                                      | EC 3.5.1.41  |                    |                                                                                                                                                                                                                                  |
|           |   |   | Chitooligosaccharide deacetylase                                        | EC 3.5.1.-   |                    |                                                                                                                                                                                                                                  |
|           |   |   | Peptidoglycan GlcNAc deacetylase                                        | EC 3.5.1.-   |                    |                                                                                                                                                                                                                                  |
|           |   |   | Peptidoglycan N-acetylmuramic acid Deacetylase                          | EC 3.5.1.-   |                    |                                                                                                                                                                                                                                  |
| CE5       | ● | ● | Acetyl xylan esterase                                                   | EC 3.1.1.72  | SHD                | $\alpha/\beta$ fold; six-stranded parallel $\beta$ -sheet surrounded by four/eight $\alpha$ -helices                                                                                                                             |
|           |   |   | Cutinases                                                               | EC 3.1.1.74  |                    |                                                                                                                                                                                                                                  |
| CE6       | ● | ● | Acetyl xylan esterase                                                   | EC 3.1.1.72  | SHE                | Repeated $\alpha/\beta/\alpha$ motifs                                                                                                                                                                                            |
| CE7       | ● |   | Acetyl xylan esterase                                                   | EC 3.1.1.72  | SHD                | $\alpha/\beta$ hydrolase fold; common hexameric quaternary structure                                                                                                                                                             |
| CE8       | ● | ● | Pectin methylesterases                                                  | EC 3.1.1.11  | DDR                | Right-handed $\beta$ -helix fold                                                                                                                                                                                                 |
| CE9       | ● |   | N-acetylglucosamine 6-phosphate deacetylase                             | EC 3.5.1.25  | D                  | Distorted ( $\beta/\alpha$ ) <sub>8</sub> barrel; dependency of metal ion (Fe <sup>2+</sup> , Zn <sup>2+</sup> , Co <sup>2+</sup> , Cu <sup>2+</sup> ) for enzymatic activity                                                    |
|           |   |   | N-acetylgalactosamine 6-phosphate deacetylase                           | EC 3.5.1.80  |                    |                                                                                                                                                                                                                                  |
| CE11      | ● | ● | UDP-3-O-acyl-N-acetylglucosamine deacetylases                           | EC 3.5.1.-   | E                  | Two-layer-sandwich with two domains, each containing a five-stranded $\beta$ -sheet and two $\alpha$ -helices; Zn <sup>2+</sup> -dependent                                                                                       |
| CE12      | ● | ● | Pectin acetylerases                                                     | EC3.1.1.-    | SHD                | Repeated $\alpha/\beta/\alpha$ motifs                                                                                                                                                                                            |
|           |   |   | rhamnogalacturonan acetylerases                                         | EC 3.1.1.86  |                    |                                                                                                                                                                                                                                  |
| CE13      |   | ● | acetyl xylan esterase                                                   | EC 3.1.1.72  | SHD                | Unknown                                                                                                                                                                                                                          |
|           |   |   | Pectin acetylerase                                                      | EC3.1.1.-    |                    |                                                                                                                                                                                                                                  |
| CE14      | ● | ● | N-acetyl-1-D-myo-inositol-2-amino-2-deoxy-D-glucopyranoside deacetylase | EC 3.5.1.89  |                    | $\alpha/\beta$ hydrolase fold; N-terminal with a Rossmann fold motif; Zn <sup>2+</sup> -dependent                                                                                                                                |
|           |   |   | Diacylchitobiose deacetylase                                            | EC3.5.1.-    |                    |                                                                                                                                                                                                                                  |
|           |   |   | Mycosial S-conjugate amidase                                            | EC3.5.1.115  |                    |                                                                                                                                                                                                                                  |
| CE15      | ● | ● | 4-O-methyl-glucuronoyl methylesterase                                   | EC 3.1.1.-   | SHE                | $\alpha/\beta$ hydrolase fold; N-terminal with a Rossmann fold motif                                                                                                                                                             |
| CE16      | ● | ● | Acetylerase                                                             | EC 3.1.1.6   | Unknown            | Unknown                                                                                                                                                                                                                          |
| CE17      | ● |   | Acetylmannan esterase                                                   | EC 3.1.1.-   | SHD                | $\alpha/\beta$ hydrolase fold                                                                                                                                                                                                    |
| CE18      | ● | ● | N-acetylgalactosamine deacetylase                                       | EC 3.5.1.-   | DHH                | ( $\beta/\alpha$ ) <sub>7</sub> barrel; Zn <sup>2+</sup> -dependent                                                                                                                                                              |
| CE19      | ● |   | Pectin methylesterase                                                   | EC 3.1.1.11  | D                  | Unknown                                                                                                                                                                                                                          |
| CE20      | ● |   | Xyloglucan acetylerase                                                  | EC 3.1.1.-   | SHD                | $\alpha/\beta$ hydrolase fold                                                                                                                                                                                                    |

Abbreviations: B, Bacteria; E, Eukaryota.

\*CE10s are not included in this Table as they are esterases acting on non-carbohydrate substrates.

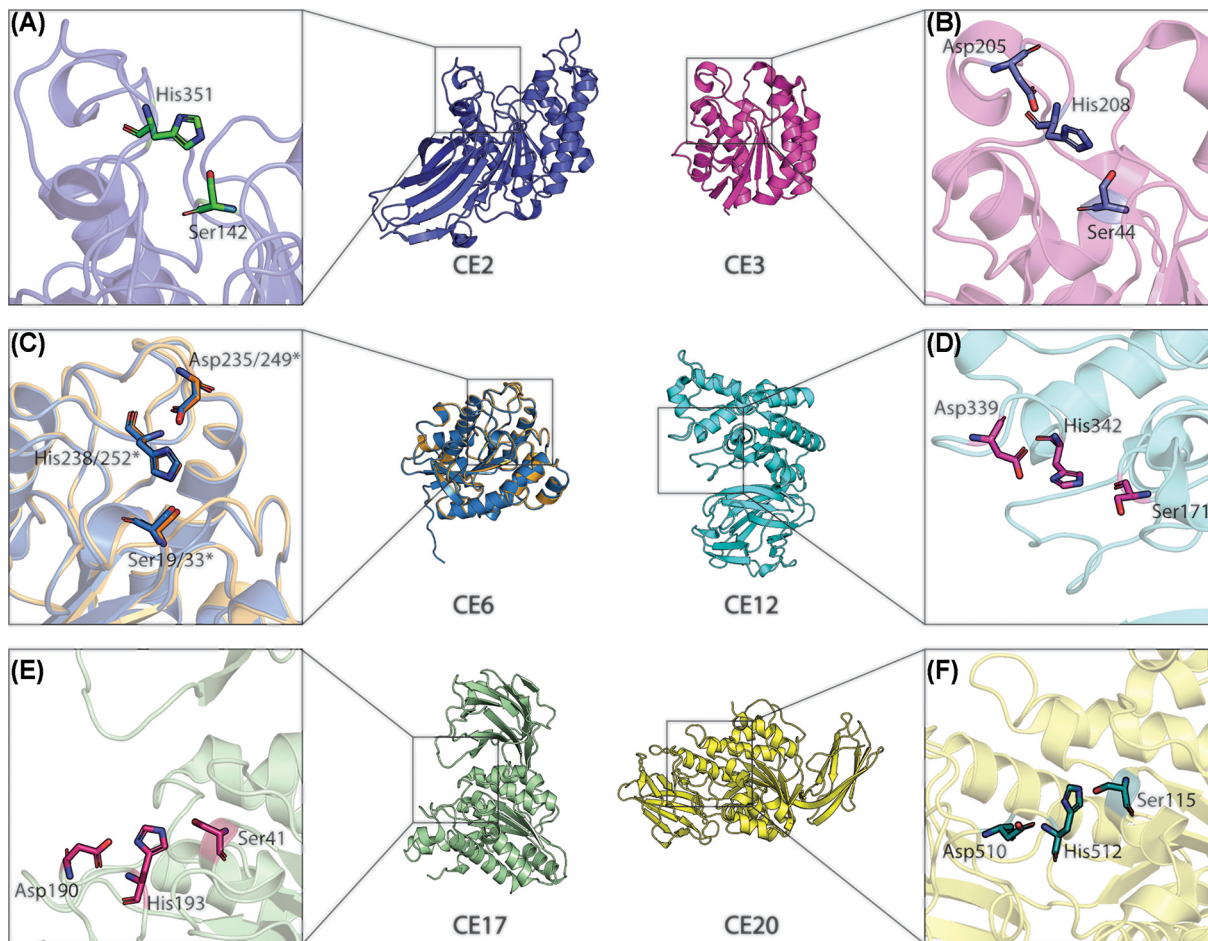

**Figure 2. Structures of acetyl esterases from the families CE2, 3, 6, 12, 17, and 20 (all being representatives of the SGNH superfamily).**

(A) An acetyl xylan esterase (AXE) from *Butyrivibrio proteoclasticus* from CE2 (PDB: 3U37). (B) AXE from *Clostridium thermocellum* from CE3 (PDB: 2VPT). (C) Two superimposed structures of AlphaFold-predicted catalytic domains of AXEs from *Bacteroides intestinalis* (blue) and *Bacteroides ovatus* (orange) from CE6 (\* annotates the active site residues for *B. ovatus*) (Protein: BACINT\_04211 and BACOVA\_03435, respectively). (D) Uncharacterized AXE/ pectin-/ rhamnogalacturonan acetyl esterase from *Bacillus subtilis* from CE12 (PDB: 2O14). (E) An acetyl mannan esterase from *Roseburia intestinalis* from CE17 (PDB: 6HFZ). (F) Xyloglucan acetyl esterase from *Xanthomonas citri* pv. *citri* from CE20 (PDB: 7KMM). #The CE6 structures from *B. intestinalis* and *B. ovatus* are from AlphaFold [30] and the Ser-His-Asp catalytic triad was predicted from the structure of an AXE CE6 from *Arabidopsis thaliana* (PDB: 2APJ), using superimposition of the structures in PyMOL (RMSD = 0.2 Å). *B. intestinalis* and *B. ovatus* are common members of the gut microbiota and a PUL from each (*B. intestinalis* DSM 17393, PUL 1, protein: BACINT\_04211; *B. ovatus* ATCC 8483, PUL 73, protein: BACOVA\_03435) with the CE6, flanked by xylanases, was selected for the predicted xylan activity.

low RMSD score in comparison with an RGI-active CE12. CE12s are part of a number of pectin PULs like, e.g., in *Bacteroides cellulosilyticus* [29]. CE20s seem to be the predominant esterases present in xyloglucan-PULs. One example is the recently characterized funding member of the CE20 family that is active on acetylated xyloglucan [15] (Figure 2F). When looking into the CAZy database for other representatives of the CE20 family, these are found in a number of commensal gut microbes and are closely associated with enzyme systems involved in degradation of xyloglucan as well as xylan and pectin PULs.

Enzyme systems for deacetylations of the more heavily ornamented regions of pectins have been discovered more recently in *Bacteroides thetaiotamicron*, although not characterized in detail. RGI-PUL harbors a gene encoding the esterase BT4158 which releases acetyl groups from D-GalUA in the RGI backbone, an important step in the depolymerization of the polymer [31]. Notably, BT4158 is active on RGI pectin as well as on xylan and glucomannan and is typically broad specific; this esterase is not affiliated with any CAZy family yet [31]. Another relatively recently

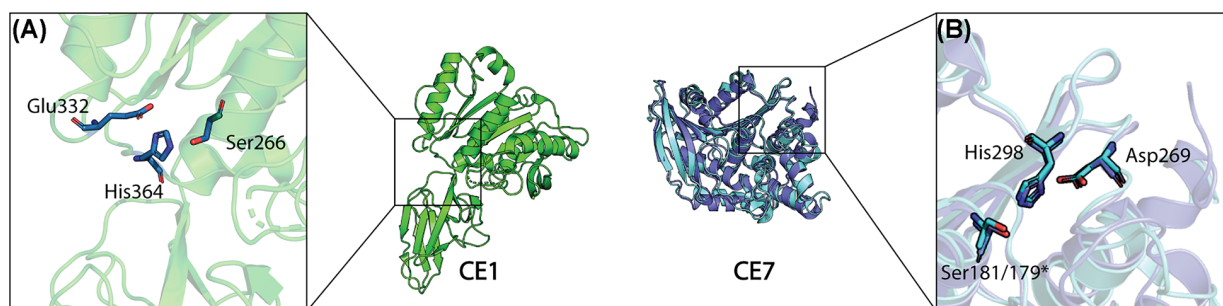

**Figure 3. Acetyl esterases that are not part of the SGNH superfamily.**

(A) AXE from *B. intestinalis* from CE1 (PDB: 6NE9). (B) AXE/cephalosporin C deacetylase from *B. subtilis* (purple) and *Lactococcus lactis* (cyan) from CE7. The two structures were superimposed in PyMOL with an RMSD of 1.1 Å (\* denotes the predicted active site residues for *L. lactis*) (PDB: *L. subtilis*: 1ODS; *L. lactis*: 7CUZ).

identified esterase is Bt0985 in the RGII-PUL of *B. thetaiotamicron*, which is a CE20 active on an aceric acid and a fucose in RGII pectin [32]. *Bacteroides* sp. 2\_2\_4 has a galactan PUL with two esterases, one CE12 and one unclassified esterase containing a GDSL like (PF16255) domain (a fold often identified with esterase activities). The presence of esterases in this PUL [33] might be explained by the fact that galactans, even though are not acetylated themselves, are often part of the ramified RGI structure. It is evident that a huge number of pectin PULs consist of proteins with esterase activities or hypothetical proteins with sequence identity to GDSL-like proteins.

## Deacetylation of xylan

Xylans are major components of commonly consumed cereal grains [29], fruits, and vegetables, where they can comprise 30–50% of the dry weight. Depending on the plant origin, xylans show substantial heterogeneity and structural variation. A conserved feature in xylans is the  $\beta$ -1,4-linked xylose main chain that can be substituted with L-arabinosyl substitutions linked at xylose 2-*O* and/or 3-*O* (arabinoxylan or AX), D-glucuronic acid and/or 4-*O*-methyl-D-glucuronic acid linked to the 2-*O* position (glucuronoxylan or GX, glucuronarabinoxylan or GAX), or p-coumaric acid and ferulic acid esterified on the 5-*O* of the substituted arabinose. The backbone of AX, GAX and GX is usually acetylated at 2-*O* and/or 3-*O*, with the latter being more frequent. 3-*O* acetylations can also be present on 4-*O*-methylglucuronic acid substituted Xylp residues in GX [34].

Acetylxylan esterases catalyzing the removal of acetyl groups in xylans belong to the families CE1–7 and 16 [34]. The different families seem to act on specific positions, whereby CE4 can deacetylate both 2-*O* or 3-*O* substitutions but only if the xylose residue is mono-acetylated, while CE1 (Figure 3A), 5, 6 (Figure 2C) and 16 can act on double acetylated xylose residues. Removal of the 3-*O*-acetylation of methyl-D-glucuronic acid residues has been reported to be mediated by CE16 [34], but no gut bacteria-derived enzymes are represented in this family. The CE3 family (Figure 2B) has only a few bacterial representatives but none is from the most common gut bacteria. The CE7 family (Figure 3B) is considered multifunctional as its members display activity towards xylooligosaccharides and the antibiotic cephalosporin C [35]. Furthermore, several CE7s seem to be associated to PULs not related to xylan degradation and this family of esterases may have a broader substrate specificity than is known today.

Acetyl esterases have been reported in PULs encoding enzymes for the depolymerization of both simple and complex xylans by Firmicutes and Bacteroidetes. Among the Firmicutes, *Roseburia intestinalis* harbors a PUL with a gene coding for a newly described xylan esterase named RiAXE. The enzyme showed activity toward beechwood glucuronoxylan oligosaccharides with efficient deacetylation of both 2-*O*-acetylated xylose and 3-*O*-acetylated xylose but with a preference for 2-*O* substitutions [36].

In human gut Bacteroidetes, *Bacteroides intestinalis* was shown to possess esterase-enriched PULs (with up to five esterase genes) encoding CE1s or multimodular CE1-CE6 enzymes targeting acetyl groups in arabinoxylan. The 3D structure of the two esterases Bi1039-CE1 and Bi1033-CE1 consist of an N-terminal Ig-like fold of approximately 100 residues followed by the esterase domain. Despite sharing structural homology and a conserved architecture of the active site, Bi1039-CE1 (Figure 3A) was shown to be an acetyl-xylan esterase able to remove acetyl groups from oat spelt xylan, while Bi1033-CE1 is a ferulic acid esterase [37]. Another Bacteroidetes with a strong emphasis on plant-derived xylans abundant in dietary staples like cereal grains is *B. cellulosilyticus* [29] which has two tightly regulated xylan PULs, with one of them harboring genes encoding a CE1 and a CE6.

A CE6 was recently identified and characterized in a PUL targeting xylan in the gut Bacteroidetes *Dysgonomonas mossii*. The enzyme was shown to be a highly efficient esterase on different model substrates, removing both 2-*O* and 3-*O* acetylations, as well as on complex biomass like GAX from corn cob. Two CE1 esterases encoded by the same PUL were also shown to remove feruloyl residues, suggesting that *D. mossii* devotes remarkable resources to promote accessibility of xylan and boost xylanase degradation capabilities of complex substrates [37].

## Deacetylation of $\beta$ -mannans

$\beta$ -Mannans are hemicellulosic polysaccharides based on a backbone of  $\beta$ -1,4 linked mannose (Figure 1). They are the most abundant form of hemicellulose in the secondary cell wall of softwoods, legume seeds and coffee beans. In softwoods,  $\beta$ -mannans constitute approximately 20% of dry wood mass [38]. In glucomannans, such as konjac (*Amorphophallus konjac*), the backbone presents non-repeating patterns of  $\beta$ -1,4 linked mannosyl and glucosyl units in varying ratios. In galactomannans, such as carob (*Ceratonia siliqua*), the backbone is substituted with  $\alpha$ -1,6-linked galactose residues [39]. Galactoglucomannans have a main chain which consists of randomly distributed mannose and glucose sugars and branched galactose units linked only to the mannosyl units. Mannans, glucomannans and galactoglucomannans can also be decorated with acetyl groups at the positions 2-*O*, 3-*O*, 4-*O* (only in non-reducing end) or 6-*O* (Figure 1), which enhance their solubility and their ability to form gels. Both glucomannans and galactomannans are widely utilized in the food industry due to their properties such as thickeners, binders, and stabilizers [40]. Galactomannans can act synergistically with other polysaccharides such as agar, xanthan gum and carrageenans resulting in mixed gel formation and increased viscosity. In addition, galactoglucomannan from spruce wood has recently been shown to have prebiotic properties by promoting the selective stimulation of beneficial bacterial populations in the pig gut microbiota [41].

Several CE families such as CE2 and CE17 [42] contain enzymes targeting  $\beta$ -mannans as well as a hitherto unclassified pectin active BT4158 mentioned above [31]. While the CE2 family is classified as acetyl xylan esterases in the CAZy database, several characterized CE2s are seemingly nonspecific and are also active on acetylated konjac glucomannan and galactoglucomannan [42,43]. Some CE2s have been reported to have a preference for deacetylating the 3-*O* and 4-*O* position over 2-*O* position on monoacetylated xylopyranosides, whereas on mannopyranosyl and glucopyranosyl units it shows high specificity towards 6-*O* acetylations [44]. A characteristic feature for the CE2s (Figure 2A, this CE2 has an RMSD score of 1.6 Å with the AlphaFold predicted model of *R. intestinalis* CE2) is the two-domain architecture, with a C-terminal catalytic SGNH domain and an N-terminal jelly roll domain. Many of the CE2s differ from other CE families with having a conserved Ser-His catalytic dyad instead of the more usual Ser-His-Asp catalytic triad [43]. CE2s are often found together with CE17s within PUL in Firmicutes members of the gut microbiota. Indeed, *R. intestinalis* and *Faecalibacterium prausnitzii* possess PULs containing a pair of CE2 and CE17 that catalyze the specific deacetylation of  $\beta$ -mannans. While CE2s from both *R. intestinalis* and *F. prausnitzii* remove various acetylations on mannose units, they were shown to be inactive on the axially oriented 2-*O* acetylations [42,45]. On the contrary, CE17s were found to act specifically on 2-*O* acetylations and work in tandem with CE2, where a CE17 is required to first remove the 2-*O* acetylation and give access to CE2 for removal of acyl substitutions in other positions. The characterized CE17 from *R. intestinalis* (*Ri*CE17) (Figure 2E) consists of an N-terminal SGNH hydrolase domain connected to a C-terminal carbohydrate binding module 35 (CBM35) domain. The structure of *Ri*CE17 co-crystallized with a  $\beta$ -mannan showed that the CBM35 is important for substrate recognition and binding cooperatively with the SGNH domain creating a narrow tight ‘clamp’ that facilitates substrate binding with the C2-OH group on mannose units suggestively acetyl in this position directly attacked by the catalytic Ser-OH group close to the oxyanion hole.

On a peculiar note, in *Lactococcus lactis* the CE7 (Figure 3B) is flanked with a mannosidase (GH113) which implies that *L. lactis* may be part able to utilize simple mannan structures and pinpoints a broader specificity in this CE family. Of note, *Lactococcus lactis* produces acetylated EPS (Figure 1), [46] and the CE7 may be part of housekeeping genes modulating its own EPS formation during growth.

## Acetyl orientation and migration in polysaccharides

Compared to other acetylated hemicelluloses, a unique feature of the *O*-acetyl groups linked to the mannose residues of the  $\beta$ -mannans backbone is their orientation; while the 3-*O*-acetylations are in the equatorial plane of the molecule, 2-*O*-acetylations are axial. A number of studies have also reported the presence, although to a lesser amount, of 6-*O*-acetylations in glucomannans and galactoglucomannans [47]. Acetylations in this position are considered to be a result of a process called migration which is hypothesized to be ‘clockwise’ (meaning from 2-*O*  $\rightarrow$  3-*O*  $\rightarrow$  4-*O*  $\rightarrow$  6-*O*) migration [48] but is also convincingly shown to occur across the glycosidic bond [49] on the mannose sugar

ring when the substrate is exposed to high temperatures and pH around 7 [48]. Indeed, acetyl group migration is a spontaneous reaction in aqueous medium, and its occurrence increases with pH and temperature [50]. Notably, migration is of more general nature and occurs rapidly on xylan [50] and neuraminic acids [51], and likely also on other polysaccharides mentioned in this review.

## Deacetylation of bacterial exopolysaccharides

A large number of microbes used in food industry produce exopolysaccharides that contribute with important rheological properties [52]. Many of these EPS are acetylated in different monosaccharide residues (rhamnose, galactose, glucose, mannose and glucuronic acid) and positions (Figure 1). Several EPS structures [53] with acetylations have been reported (see Figure 1), including xanthan gum in *Xanthomonas campestris* [54], gellan gum (E418) in *Sphingomonas paucimobilis* strain I-886 [55] (formerly known as *Pseudomonas elodea*), *Lactiplantibacillus plantarum* C88 [56], *Lactobacillus sakei* 0-1 [57] *Lactococcus lactis* subsp. *cremoris* [58], *Lactobacillus pentosus* [59], and *Butyrivibrio fibrisolvens* strain H10b [60]. The acetyl ornamentations contribute to the EPS properties. For example, high acyl gellan gum (GG) forms soft and elastic gels, whereas low acyl GG forms hard, non-elastic, and brittle gels [61]. Despite a recent study that shows indications that three acetyl esterases are involved in degradation of xanthan gum (further details below), knowledge regarding deacetylation of other EPS remains elusive.

Generally, little is known about how bacteria interact and cross-feed/recycle each other's cell wall material. Only a few studies have provided some information on how bacteria feed on other bacterial cells, but the understanding on this matter remains largely enigmatic. Some examples which demonstrate bacterial growth on EPS are summarized in [62]: gellan gum promotes growth of probiotic strains such as *Lactiplantibacillus rhamnosus* and *Bifidobacterium bifidum* [61]; *B. thetaiotamicron* grows on lactobacilli EPS [63]; *Bacteroides* grows on EPS structures produced by bifidobacteria [64]; a fructan-type EPS promotes growth of bifidobacteria [65]; bifidobacteria EPS is readily fermentable by gut microbiota [66] and further alters the gut microbiota composition [67,68]. However, when looking at these growth studies, very little focus has been put on the role of non-carbohydrate modifications, like acetyl substitutions, present on the EPS. To the best of our knowledge, the only representative study to date which has some focus on acetylation is on xanthan degradation described in the following section.

## Deacetylation of the food additive xanthan gum

While EPS from fermented food as well as hemicellulosic and pectic polysaccharides have been components of the human diet for millennia, food additives such as xanthan gum (see Figure 1.) have only been consumed, through processed foodstuffs, for the last five decades. Despite the recent inclusion, a single gut microbe from the Ruminococcaceae uncultured genus 13 (R. UCG13) was discovered to possess the complete enzymatic apparatus necessary to depolymerize xanthan gum. The model proposed is that R. UCG13 deploys an extracellular GH5 xanthanase to cleave the XG backbone and generates oligosaccharides for uptake. The degradation products can be utilized by the R. UCG13 itself or by a *B. intestinalis* that contains the appropriate degradation system apart from the initial depolymerizing enzyme [69]. Both microbes possess a lyase and a glucuronyl hydrolase to remove the terminal mannose and glucuronic acid from the pentasaccharide, as well as intracellular carbohydrate esterases (RuCE-A, RuCE-B and BiPL-CE) that cleave the 6-O acetyl group from the internal mannose [69], and potentially also the 6-O acetyl group on the outer mannose unit (which occur in some of the pentasaccharides [70]). Sequence analysis of three esterases shows that they all are part of the SGNH-hydrolase family and have a typical SHD catalytic triad. Once deacetylated, further hydrolysis of the remaining trisaccharide structure is mediated by an additional  $\alpha$ -mannosidase (GH38 or GH92) and a GH94 cellobiose phosphorylase in R. UCG13 or a GH3  $\beta$ -glucosidase in *B. intestinalis*, respectively.

## Closing remarks

O-Acetylated dietary fibers have been a component of the human diet for millennia. Acetylation hinders the access of glycoside hydrolases to the substituted polysaccharide, thus preventing its depolymerization [42,58,71]. The hypercompetitive nature of the densely populated human gut environment has driven microorganisms to adapt and evolve their enzymatic toolboxes to target these non-carbohydrate decorations and gain an advantage over less equipped species. Sequencing technology has facilitated the identification of systems deployed by gut bacteria to utilize acetylated food components and in-depth enzymatic characterizations have uncovered a significant number of new O-acetyl esterases that differ in substrate and positional specificity [15,31,42,69]. Of note, the gut microbiota also experiences variations of naturally occurring polysaccharides, since some modifications are likely to occur during food/ingredient processing. For example, acetyl migration can occur to a large extent at neutral pH and 'benign' temperatures (60°C) [5]. This increase carbohydrate's structural complexity, and positions of acetylations may differ in



processed foods compared with those found in naturally existing polymers. This aspect should be taken into account for the correct functional characterization of acetyl esterases.

A considerable number of acetyl esterases from members of the abundant phyla Firmicutes and Bacteroidetes have been described to target hemicelluloses and pectins. Still, apart from three esterases involved in the de-acetylation of the food additive xanthan gum [69], esterases targeting acetylations in bacterial exopolysaccharides are under-explored. Given the abundance of bacterial-derived exopolysaccharides (including several structures carrying acetyl ornamentations) in food and beverages, and the fact that the gut microbiota is constantly exposed to these carbohydrates, it is expected that research on gut microbiology will continue to yield more esterases playing key roles in depolymerization of these complex substrates. Furthermore, it is envisaged that newly discovered deacetylases can be applied to modify physico-chemical and rheological properties of acetylated plant- and microbial- polysaccharides to be used as food additives and in material chemistry.

## Summary

- Acetylated hemicellulosic and pectic polysaccharide structures as well as exopolysaccharides from food microbes are very common in the human diet as components of foods and beverages.
- Human gut microbiota members use complex degradation systems equipped with carbohydrate esterases to remove acetyl ornamentations and facilitate the activity of other enzymes targeting the glycan part of the polymer.
- Polysaccharide utilization systems include broad specific and highly specific acetyl esterases targeting acetylations in virtually all positions of glycans.
- Continued efforts in the field, using biochemical and structural studies, will help to precisely illuminate the molecular mechanisms behind complex carbohydrate utilization by human gut microbes and advance the understanding of their role in human nutrition.

## Competing Interests

The authors declare that there are no competing interests associated with the manuscript.

## Funding

This work was supported by the Norwegian Research Council project numbers 326272, 309558, 244259, 311913, and 300846.

## Acknowledgements

Peter Biely has been a great inspiration and sparking the curiosity for studying acetyl esterases and the intricacies of acetylation in complex glycans.

## Abbreviations

CE, carbohydrate esterase; HG, homogalacturonan; GH, glycoside hydrolase; PUL, polysaccharide utilization locus; RGI, rhamnogalacturonan I; RGII, rhamnogalacturonan II; SCFA, short-chain fatty acid; XyG, xyloglucan.

## References

- 1 La Rosa, S.L., Ostrowski, M.P., Vera-Ponce de León, A., McKee, L.S., Larsbrink, J., Eijsink, V.G. et al. (2022) Glycan processing in gut microbiomes. *Curr. Opin. Microbiol.* **67**, 102143, <https://doi.org/10.1016/j.mib.2022.102143>
- 2 Louis, P. and Flint, H.J. (2017) Formation of propionate and butyrate by the human colonic microbiota. *Environ. Microbiol.* **19**, 29–41, <https://doi.org/10.1111/1462-2920.13589>
- 3 McKee, L.S., La Rosa, S.L., Westereng, B., Eijsink, V.G., Pope, P.B. and Larsbrink, J. (2021) Polysaccharide degradation by the Bacteroidetes: mechanisms and nomenclature. *Environ. Microbiol. Rep.* **13**, 559–581, <https://doi.org/10.1111/1758-2229.12980>
- 4 El Kaoutari, A., Armougom, F., Gordon, J.I., Raoult, D. and Henrissat, B. (2013) The abundance and variety of carbohydrate-active enzymes in the human gut microbiota. *Nat. Rev. Microbiol.* **11**, 497–504, <https://doi.org/10.1038/nrmicro3050>
- 5 Bjursell, M.K., Martens, E.C. and Gordon, J.I. (2006) Functional genomic and metabolic studies of the adaptations of a prominent adult human gut symbiont, *Bacteroides thetaiotaomicron*, to the suckling period. *J. Biol. Chem.* **281**, 36269–36279, <https://doi.org/10.1074/jbc.M606509200>

- 6 Lombard, V., Golaconda Ramulu, H., Drula, E., Coutinho, P. and Henrissat, B. (2014) The carbohydrate-active enzymes database (CAZy) in 2013. *Nucleic Acids Res.* **42**, D490–D495, <https://doi.org/10.1093/nar/gkt1178>
- 7 Drula, E., Garron, M.-L., Dogan, S., Lombard, V., Henrissat, B. and Terrapon, N. (2021) The carbohydrate-active enzyme database: functions and literature. *Nucleic Acids Res.* **50**, D571–D577, <https://doi.org/10.1093/nar/gkab1045>
- 8 Mohnen, D. (2008) Pectin structure and biosynthesis. *Curr. Opin. Plant Biol.* **11**, 266–277, <https://doi.org/10.1016/j.pbi.2008.03.006>
- 9 Burton, R.A., Gidley, M.J. and Fincher, G.B. (2010) Heterogeneity in the chemistry, structure and function of plant cell walls. *Nat. Chem. Biol.* **6**, 724–732, <https://doi.org/10.1038/nchembio.439>
- 10 Obel, N., Erben, V., Schwarz, T., Kühnel, S., Fodor, A. and Pauly, M. (2009) Microanalysis of plant cell wall polysaccharides. *Mol. Plant* **2**, 922–932, <https://doi.org/10.1093/mp/ssp046>
- 11 Sørensen, H.M., Rochfort, K.D., Maye, S., MacLeod, G., Brabazon, D., Loscher, C. et al. (2022) Exopolysaccharides of lactic acid bacteria: production, purification and health benefits towards functional food. *Nutrients* **14**, 2938, <https://doi.org/10.3390/nu14142938>
- 12 Varki, A., Cummings, R.D., Aebi, M., Packer, N.H., Seeberger, P.H., Esko, J.D. et al. (2015) Symbol nomenclature for graphical representations of glycans. *Glycobiology* **25**, 1323–1324, <https://doi.org/10.1093/glycob/cwv091>
- 13 Neelamegham, S., Aoki-Kinoshita, K., Bolton, E., Frank, M., Lisacek, F., Lütteke, T. et al. (2019) Updates to the symbol nomenclature for glycans guidelines. *Glycobiology* **29**, 620–624, <https://doi.org/10.1093/glycob/cwz045>
- 14 Anderson, A.C., Stangherlin, S., Pimentel, K.N., Weadge, J.T. and Clarke, A.J. (2022) The SGNH hydrolase family: a template for carbohydrate diversity. *Glycobiology* **32**, 826–848, <https://doi.org/10.1093/glycob/cwac045>
- 15 Vieira, P.S., Bonfim, I.M., Araujo, E.A., Melo, R.R., Lima, A.R., Fessel, M.R. et al. (2021) Xyloglucan processing machinery in *Xanthomonas* pathogens and its role in the transcriptional activation of virulence factors. *Nat. Commun.* **12**, 4049, <https://doi.org/10.1038/s41467-021-24277-4>
- 16 Nakamura, A.M., Nascimento, A.S. and Polikarpov, I. (2017) Structural diversity of carbohydrate esterases. *Biotechnol. Res. Innovation* **1**, 35–51, <https://doi.org/10.1016/j.biori.2017.02.001>
- 17 Ralet, M.-C., Cabrera, J.C., Bonnin, E., Quémener, B., Hellin, P. and Thibault, J.-F. (2005) Mapping sugar beet pectin acetylation pattern. *Phytochemistry* **66**, 1832–1843, <https://doi.org/10.1016/j.phytochem.2005.06.003>
- 18 Willats, W.G.T., Knox, P. and Mikkelsen, J.D. (2006) Pectin: new insights into an old polymer are starting to gel. *Trends Food Sci. Technol.* **17**, 97–104, <https://doi.org/10.1016/j.tifs.2005.10.008>
- 19 Du, J., Anderson, C.T. and Xiao, C. (2022) Dynamics of pectic homogalacturonan in cellular morphogenesis and adhesion, wall integrity sensing and plant development. *Nat. Plants* **8**, 332–340, <https://doi.org/10.1038/s41477-022-01120-2>
- 20 Guillotin, S.E., Bakx, E.J., Boulenguer, P., Mazoyer, J., Schols, H.A. and Voragen, A.G.J. (2005) Populations having different GalA blocks characteristics are present in commercial pectins which are chemically similar but have different functionalities. *Carbohydr. Polym.* **60**, 391–398, <https://doi.org/10.1016/j.carbpol.2005.02.001>
- 21 Lau, J.M., McNeil, M., Darvill, A.G. and Albersheim, P. (1987) Treatment of rhamnogalacturonan I with lithium in ethylenediamine. *Carbohydr. Res.* **168**, 245–274, [https://doi.org/10.1016/0008-6215\(87\)80029-0](https://doi.org/10.1016/0008-6215(87)80029-0)
- 22 Carpita, N.C. and Gibeaut, D.M. (1993) Structural models of primary-cell walls in flowering plants - consistency of molecular-structure with the physical-properties of the walls during growth. *Plant J.* **3**, 1–30, <https://doi.org/10.1111/j.1365-313X.1993.tb00007.x>
- 23 Ishii, T. (1997) O-acetylated oligosaccharides from pectins of potato tuber cell walls. *Plant Physiol.* **113**, 1265–1272, <https://doi.org/10.1104/pp.113.4.1265>
- 24 Schultink, A., Liu, L., Zhu, L. and Pauly, M. (2014) Structural diversity and function of xyloglucan sidechain substituents. *Plants* **3**, 526–542, <https://doi.org/10.3390/plants3040526>
- 25 York, W.S., Oates, J.E., van Halbeek, H., Darvill, A.G., Albersheim, P., Tiller, P.R. et al. (1988) Location of the O-acetyl substituents on a nonasaccharide repeating unit of sycamore extracellular xyloglucan. *Carbohydr. Res.* **173**, 113–132, [https://doi.org/10.1016/S0008-6215\(00\)90807-3](https://doi.org/10.1016/S0008-6215(00)90807-3)
- 26 Jia, Z., Cash, M., Darvill, A.G. and York, W.S. (2005) NMR characterization of endogenously O-acetylated oligosaccharides isolated from tomato (*Lycopersicon esculentum*) xyloglucan. *Carbohydr. Res.* **340**, 1818–1825, <https://doi.org/10.1016/j.carres.2005.04.015>
- 27 Remoroza, C., Wagenknecht, M., Gu, F., Buchholt, H.C., Moerschbacher, B.M., Schols, H.A. et al. (2014) A *Bacillus licheniformis* pectin acetyltransferase is specific for homogalacturonans acetylated at O-3. *Carbohydr. Polym.* **107**, 85–93, <https://doi.org/10.1016/j.carbpol.2014.02.006>
- 28 Sengkhamparn, N., Bakx, E.J., Verhoef, R., Schols, H.A., Sajjanantakul, T. and Voragen, A.G. (2009) Okra pectin contains an unusual substitution of its rhamnosyl residues with acetyl and alpha-linked galactosyl groups. *Carbohydr. Res.* **344**, 1842–1851, <https://doi.org/10.1016/j.carres.2008.11.022>
- 29 McNulty, N.P., Wu, M., Erickson, A.R., Pan, C.L., Erickson, B.K., Martens, E.C. et al. (2013) Effects of diet on resource utilization by a model human gut microbiota containing *Bacteroides cellulosilyticus* WH2, a symbiont with an extensive glycomiome. *PLoS Biol.* **11**, e1001637, <https://doi.org/10.1371/journal.pbio.1001637>
- 30 Jumper, J., Evans, R., Pritzel, A., Green, T., Figurnov, M., Ronneberger, O. et al. (2021) Highly accurate protein structure prediction with AlphaFold. *Nature* **596**, 583–589, <https://doi.org/10.1038/s41586-021-03819-2>
- 31 Luis, A.S., Briggs, J., Zhang, X., Farnell, B., Ndeh, D., Labourel, A. et al. (2018) Dietary pectic glycans are degraded by coordinated enzyme pathways in human colonic *Bacteroides*. *Nat. Microbiol.* **3**, 210–219, <https://doi.org/10.1038/s41564-017-0079-1>
- 32 Ndeh, D., Rogowski, A., Cartmell, A., Luis, A.S., Baslé, A., Gray, J. et al. (2017) Complex pectin metabolism by gut bacteria reveals novel catalytic functions. *Nature* **544**, 65–70, <https://doi.org/10.1038/nature21725>
- 33 Terrapon, N., Lombard, V., Drula, É., Lapébie, P., Al-Masaudi, S., Gilbert, H.J. et al. (2018) PULDB: the expanded database of Polysaccharide Utilization Loci. *Nucleic Acids Res.* **46**, D677–D683, <https://doi.org/10.1093/nar/gkx1022>
- 34 Biely, P., Ciszárová, M., Agger, J.W., Li, X.-L., Puchart, V., Vršanská, M. et al. (2014) *Trichoderma reesei* CE16 acetyl esterase and its role in enzymatic degradation of acetylated hemicellulose. *Biochim. Biophys. Acta* **1840**, 516–525, <https://doi.org/10.1016/j.bbagen.2013.10.008>

- 35 Vincent, F., Charnock, S.J., Verschuere, K.H.G., Turkenburg, J.P., Scott, D.J., Offen, W.A. et al. (2003) Multifunctional Xylooligosaccharide/Cephalosporin C Deacetylase Revealed by the Hexameric Structure of the *Bacillus subtilis* Enzyme at 1.9 Å Resolution. *J. Mol. Biol.* **330**, 593–606, [https://doi.org/10.1016/S0022-2836\(03\)00632-6](https://doi.org/10.1016/S0022-2836(03)00632-6)
- 36 Leth, M.L., Ejby, M., Workman, C., Ewald, D.A., Pedersen, S.S., Sternberg, C. et al. (2018) Differential bacterial capture and transport preferences facilitate co-growth on dietary xylan in the human gut. *Nat. Microbiol.* **3**, 570–580, <https://doi.org/10.1038/s41564-018-0132-8>
- 37 Kmezik, C., Mazurkewich, S., Meents, T., McKee, L.S., Idström, A., Armeni, M. et al. (2021) A polysaccharide utilization locus from the gut bacterium *Dysgonomonas mossii* encodes functionally distinct carbohydrate esterases. *J. Biol. Chem.* **296**, 100500, <https://doi.org/10.1016/j.jbc.2021.100500>
- 38 Lundqvist, J., Teleman, A., Junel, L., Zacchi, G., Dahlman, O., Tjerneld, F. et al. (2002) Isolation and characterization of galactoglucomannan from spruce (*Picea abies*). *Carbohydr. Polym.* **48**, 29–39, [https://doi.org/10.1016/S0144-8617\(01\)00210-7](https://doi.org/10.1016/S0144-8617(01)00210-7)
- 39 Tester, R.F. and Farage, H.A.-G. (2013) Mannans and health, with a special focus on glucomannans. *Food Res. Int.* **50**, 384–391, <https://doi.org/10.1016/j.foodres.2012.10.037>
- 40 Yamabhai, M., Sak-Ubol, S., Srila, W. and Haltrich, D. (2016) Mannan biotechnology: from biofuels to health. *Crit. Rev. Biotechnol.* **36**, 32–42, <https://doi.org/10.3109/07388551.2014.923372>
- 41 Michalak, L., Gaby, J.C., Lagos, L., La Rosa, S.L., Hvidsten, T.R., Tétard-Jones, C. et al. (2020) Microbiota-directed fibre activates both targeted and secondary metabolic shifts in the distal gut. *Nat. Commun.* **11**, 5773, <https://doi.org/10.1038/s41467-020-19585-0>
- 42 Michalak, L., La Rosa, S.L., Leivers, S., Lindstad, L.J., Røhr, Å.K., Lillelund Aachmann, F. et al. (2020) A pair of esterases from a commensal gut bacterium remove acetylations from all positions on complex  $\beta$ -mannans. *Proc. Natl. Acad. Sci.* **117**, 7122–7130, <https://doi.org/10.1073/pnas.1915376117>
- 43 Montanier, C., Money, V.A., Pires, V.M.R., Flint, J.E., Pinheiro, B.A., Goyal, A. et al. (2009) The active site of a carbohydrate esterase displays divergent catalytic and noncatalytic binding functions. *PLoS Biol.* **7**, 687–697, <https://doi.org/10.1371/journal.pbio.1000071>
- 44 Topakas, E., Kyriakopoulos, S., Biely, P., Hirsch, J., Vafiadi, C. and Christakopoulos, P. (2010) Carbohydrate esterases of family 2 are 6-O-deacetylases. *FEBS Lett.* **584**, 543–548, <https://doi.org/10.1016/j.febslet.2009.11.095>
- 45 Lindstad, L.J., Lo, G., Leivers, S., Lu, Z., Michalak, L., Pereira, G.V. et al. (2021) Human gut *Faecalibacterium prausnitzii* deploys a highly efficient conserved system to cross-feed on  $\beta$ -mannan-derived oligosaccharides. *mBio.* **12**, e0362820, <https://doi.org/10.1128/mBio.03628-20>
- 46 Skjåk-Bræk, G., Zanetti, F. and Paoletti, S. (1989) Effect of acetylation on some solution and gelling properties of alginates. *Carbohydr. Res.* **185**, 131–138, [https://doi.org/10.1016/0008-6215\(89\)84028-5](https://doi.org/10.1016/0008-6215(89)84028-5)
- 47 Singh, S., Singh, G. and Arya, S.K. (2018) Mannans: an overview of properties and application in food products. *Int. J. Biol. Macromol.* **119**, 79–95, <https://doi.org/10.1016/j.ijbiomac.2018.07.130>
- 48 Roslund, M.U., Aitio, O., Wärnå, J., Maaheimo, H., Murzin, D.Y. and Leino, R. (2008) Acyl group migration and cleavage in selectively protected  $\beta$ -D-galactopyranosides as studied by NMR spectroscopy and kinetic calculations. *J. Am. Chem. Soc.* **130**, 8769–8772, <https://doi.org/10.1021/ja801177s>
- 49 Lassfolk, R., Rahkila, J., Johansson, M.P., Ekholm, F.S., Wärnå, J. and Leino, R. (2018) Acetyl group migration across the saccharide units in oligomannoside model compound. *J. Am. Chem. Soc.* **141**, 1646–1654, <https://doi.org/10.1021/jacs.8b11563>
- 50 Mastihubová, M. and Biely, P. (2004) Lipase-catalysed preparation of acetates of 4-nitrophenyl  $\beta$ -D-xylopyranoside and their use in kinetic studies of acetyl migration. *Carbohydr. Res.* **339**, 1353–1360, <https://doi.org/10.1016/j.carres.2004.02.016>
- 51 Kamerling, J.P., Schauer, R., Shukla, A.K., Stoll, S., van Halbeek, H. and Vliegthart, J.F. (1987) Migration of O-acetyl groups in N,O-acetylneuraminic acids. *Eur. J. Biochem.* **162**, 601–607, <https://doi.org/10.1111/j.1432-1033.1987.tb10681.x>
- 52 Angelin, J. and Kavitha, M. (2020) Exopolysaccharides from probiotic bacteria and their health potential. *Int. J. Biol. Macromol.* **162**, 853–865, <https://doi.org/10.1016/j.ijbiomac.2020.06.190>
- 53 van Bueren, A.L., Saraf, A., Martens, E.C. and Dijkhuizen, L. (2015) Differential metabolism of exopolysaccharides from probiotic Lactobacilli by the human gut symbiont bacteroides thetaiotaomicron. *Appl. Environ. Microb.* **81**, 3973–3983, <https://doi.org/10.1128/AEM.00149-15>
- 54 Cadmus, M.C., Rogovin, S.P., Burton, K.A., Pittsley, J.E., Knutson, C.A. and Jeanes, A. (1976) Colonial variation in *Xanthomonas campestris* NRRL B-1459 and characterization of the polysaccharide from a variant strain. *Can. J. Microbiol.* **22**, 942–948, <https://doi.org/10.1139/m76-136>
- 55 Falk, C., Jansson, P.-E., Rinaudo, M., Heyraud, A., Widmalm, G. and Hebbbar, P. (1996) Structural studies of the exocellular polysaccharide from *Sphingomonas paucimobilis* strain I-886. *Carbohydr. Res.* **285**, 69–79, [https://doi.org/10.1016/0008-6215\(96\)00033-X](https://doi.org/10.1016/0008-6215(96)00033-X)
- 56 Fontana, C., Li, S., Yang, Z. and Widmalm, G. (2015) Structural studies of the exopolysaccharide from *Lactobacillus plantarum* C88 using NMR spectroscopy and the program CASPER. *Carbohydr. Res.* **402**, 87–94, <https://doi.org/10.1016/j.carres.2014.09.003>
- 57 Robijn, G.W., van den Berg, D.J.C., Haas, H., Kamerling, J.P. and Vliegthart, J.F.G. (1995) Determination of the structure of the exopolysaccharide produced by *Lactobacillus sake* O-1. *Carbohydr. Res.* **276**, 117–136, [https://doi.org/10.1016/0008-6215\(95\)00172-P](https://doi.org/10.1016/0008-6215(95)00172-P)
- 58 van Casteren, W.H.M., de Waard, P., Dijkema, C., Schols, H.A. and Voragen, A.G.J. (2000) Structural characterisation and enzymic modification of the exopolysaccharide produced by *Lactococcus lactis* subsp. *cremoris* B891. *Carbohydr. Res.* **327**, 411–422, [https://doi.org/10.1016/S0008-6215\(00\)00065-3](https://doi.org/10.1016/S0008-6215(00)00065-3)
- 59 Rodríguez-Carvajal, M.A., Ignacio Sánchez, J., Campelo, A.B., Martínez, B., Rodríguez, A. and Gil-Serrano, A.M. (2008) Structure of the high-molecular weight exopolysaccharide isolated from *Lactobacillus pentosus* LPS26. *Carbohydr. Res.* **343**, 3066–3070, <https://doi.org/10.1016/j.carres.2008.08.028>
- 60 Andersson, L., Cotta, M.A. and Kenne, L. (2003) Structural studies of the extracellular polysaccharide produced by *Butyrivibrio fibrisolvens* strain H10b. *Carbohydr. Res.* **338**, 1571–1579, [https://doi.org/10.1016/S0008-6215\(03\)00204-0](https://doi.org/10.1016/S0008-6215(03)00204-0)
- 61 Do, M.H., Lee, H.H.L., Lee, J.-E., Park, M., Oh, M.-J., Lee, H.-B. et al. (2023) Gellan gum prevents non-alcoholic fatty liver disease by modulating the gut microbiota and metabolites. *Food Chem.* **400**, 134038, <https://doi.org/10.1016/j.foodchem.2022.134038>
- 62 Oerlemans, M.M.P., Akkerman, R., Ferrari, M., Walvoort, M.T.C. and de Vos, P. (2021) Benefits of bacteria-derived exopolysaccharides on gastrointestinal microbiota, immunity and health. *J. Funct. Foods* **76**, 104289, <https://doi.org/10.1016/j.jff.2020.104289>

- 63 Lammerts van Bueren, A., Saraf, A., Martens, E.C. and Dijkhuizen, L. (2015) Differential metabolism of exopolysaccharides from probiotic *Lactobacilli* by the human gut symbiont bacteroides thetaiotaomicron. *Appl. Environ. Microbiol.* **81**, 3973–3983, <https://doi.org/10.1128/AEM.00149-15>
- 64 Rios-Covian, D., Arboleya, S., Hernandez-Barranco, A.M., Alvarez-Buylla, J.R., Ruas-Madiedo, P., Gueimonde, M. et al. (2013) Interactions between bifidobacterium and bacteroides species in cofermentations are affected by carbon sources, including exopolysaccharides produced by bifidobacteria. *Appl. Environ. Microb.* **79**, 7518–7524, <https://doi.org/10.1128/AEM.02545-13>
- 65 Korakli, M., Gänzle, M.G. and Vogel, R.F. (2002) Metabolism by bifidobacteria and lactic acid bacteria of polysaccharides from wheat and rye, and exopolysaccharides produced by *Lactobacillus sanfranciscensis*. *J. Appl. Microbiol.* **92**, 958–965, <https://doi.org/10.1046/j.1365-2672.2002.01607.x>
- 66 Ruijsenaars, H.J., Stingle, F. and Hartmans, S. (2000) Biodegradability of food-associated extracellular polysaccharides. *Curr. Microbiol.* **40**, 194–199, <https://doi.org/10.1007/s002849910039>
- 67 Salazar, N., Gueimonde, M., de los Reyes-Gavilán, C.G. and Ruas-Madiedo, P. (2016) Exopolysaccharides produced by lactic acid bacteria and bifidobacteria as fermentable substrates by the intestinal microbiota. *Crit. Rev. Food Sci.* **56**, 1440–1453, <https://doi.org/10.1080/10408398.2013.770728>
- 68 Salazar, N., Gueimonde, M., Hernández-Barranco, A.M., Ruas-Madiedo, P. and de los Reyes-Gavilán, C.G. (2008) Exopolysaccharides produced by intestinal bifidobacterium strains act as fermentable substrates for human intestinal bacteria. *J. Appl. Environmental Microbiol.* **74**, 4737–4745, <https://doi.org/10.1128/AEM.00325-08>
- 69 Ostrowski, M.P., La Rosa, S.L., Kunath, B.J., Robertson, A., Pereira, G., Hagen, L.H. et al. (2022) Mechanistic insights into consumption of the food additive xanthan gum by the human gut microbiota. *Nat. Microbiol.* **7**, 556–569, <https://doi.org/10.1038/s41564-022-01093-0>
- 70 Kool, M.M., Gruppen, H., Sworn, G. and Schols, H.A. (2014) The influence of the six constituent xanthan repeating units on the order-disorder transition of xanthan. *Carbohydr. Polym.* **104**, 94–100, <https://doi.org/10.1016/j.carbpol.2013.12.073>
- 71 Bonnin, E., Le Goff, A., van Alebeek, G.-J.W.M., Voragen, A.G.J. and Thibault, J.-F. (2003) Mode of action of *Fusarium moniliforme* endopolygalacturonase towards acetylated pectin. *Carbohydr. Polym.* **52**, 381–388, [https://doi.org/10.1016/S0144-8617\(02\)00332-6](https://doi.org/10.1016/S0144-8617(02)00332-6)
